# Supplementary material for: Whole-genome sequencing of human Pegivirus variant from an Egyptian patient co-infected with hepatitis C virus: a case report
Source: Springer Nature journal article supplement (doi:10.1186/s12985-019-1242-5), 2019-11-11
Supplement: MOESM2 [file 17374630]

JN127373.1 CACTGGGTGCAAGCCCCAGAAACCGACGCCTATCTAAGTAGACGCAATGACT 52  
Our sequence CACTGGGTGCAAGCCCCAGAAACCGACGCCTATCTAAGTAGACGCAATGACT 52  
Score \*\*\*\*\*

JN127373.1 CGGCGCCGACCCGGCGACCGGCCAAAAGGTGGTGGATGGGTGATGCCAGGGT 104  
Our sequence CGGCGCCGACCCGGCGACCGGCCAAAAGGTGGTGGATGGGTGATGCCAGGGT 104  
Score \*\*\*\*\*

JN127373.1 TGGTAGGTCGTAAATCCCGGTCATCTTGGTAGCCACTATAGGTGGGTCTTAA 156  
Our sequence TGGTAGGTCGTAAATCCCGGTCATCTTGGTAGCCACTATAGGTGGGTCTTAA 156  
Score \*\*\*\*\*

JN127373.1 GGGAAAGGTTAAGATTCCCTCTTGTGCCTGTGGCGAGACAGCGCACGGTCCACA 208  
Our sequence GGGAAAGGTTAAGATTCCCTCTTGTGCCTGTGGCGAGACAGCGCACGGTCCACA 208  
Score \*\*\*\*\*

JN127373.1 GGTGTTGGCCCTACCGGTGTGAATAAGGGCCCAGCGTCAGGCTCGTCGTTAA 260  
Our sequence GGTGTTGGCCCTACCGGTGTGAATAAGGGCCCAGCGTCAGGCTCGTCGTTAA 260  
Score \*\*\*\*\*

JN127373.1 ACCGAGACCGACACCCACCCGGGCAAACGACGCTCACGTACGGTCCACGTCCG 312  
Our sequence ACCGAGACCGACACCCACCCGGGCAAACGACGCTCACGTACGGTCCACGTCCG 312  
Score \*\*\*\*\*

JN127373.1 CCCTTCAATGTCTCTCTTGACCAATAGGCTTTGCCGGCGAGTTGACAAGGAC 364  
Our sequence CCCTTCAATGTCTCTCTTGACCAATAGGCTTTGCCGGCGAGTTGACAAGGAC 364  
Score \*\*\*\*\*

JN127373.1 CAGT**GAGGGCCGGGGGC**GAGGGGGAAAGGACCCCTC**GCCCTGCCCATTCGG** 416  
Our sequence CAGT**GAGGGCCGGGGGC**GAGGGGGAAAGGACCCCTC**GCCCTGCCCATTCGG** 416  
Score \*\*\*\*\*

JN127373.1 TGGGACGGGAAATGCAT**GGGGCCACCCAGCTCCGGCGGC**GGCCTGCAGCCGGG 468  
Our sequence TGGGACGGGAAATGCAT**GGGGCCACCCAGCTCCGGCGGC**GGCCTGCAGCCGGG 468  
Score \*\*\*\*\*

JN127373.1 GTAGCCCAAGAGCCTTCGGGT**GAGGGCGGGTGGC**ATTTTTCTTTCTTAACCG 520  
Our sequence GTAGCCCAAGAGCCTTCGGGT**GAGGGCGGGTGGC**ATTTTTCTTTCTTAACCG 520  
Score \*\*\*\*\*

JN127373.1 ATCAT**GGCAGTCCTTCTGCTCTTCTTCGTGGTT**GAGGCCGGGGCCATTCTGG 572  
Our sequence ATCAT**GGCAGTCCTTCTGCTCTTCTTCGTGGTT**GAGGCCGGGGCCATTCTGG 572  
Score \*\*\*\*\*

JN127373.1 CCCC**GGCCACCCACGCTTGT**CGGGCTGACGGGCAATATTTCTCAGAACTG 624  
Our sequence CCCC**GGCCACCCACGCTTGT**CGGGCTGACGGGCAATATTTCTCAGAACTG 624  
Score \*\*\*\*\*

JN127373.1 TTGTGCCCTTGAGGACATAGGGTTCTGCCTGGAAAGGTGGATGCCTTGTGGCC 676  
Our sequence TTGTGCCCTTGAGGACATAGGGTTCTGCCTGGAAAGGTGGATGCCTTGTGGCC 676  
Score \*\*\*\*\*

JN127373.1 CTGGGGTGTACGGTTTGTACTGACAAATGCTGGCCACTGTATCAGGCGGGTT 728  
Our sequence CTGGGGTGTACGGTTTGTACTGACAAATGCTGGCCACTGTATCAGGCGGGTT 728  
Score \*\*\*\*\*

JN127373.1 TGGCTGTGCGGCCTGGCAAGTCCGCAGCCAGCTCGTGGGGGAGCTTGGGAG 780  
Our sequence TGGCTGTGCGGCCTGGCAAGTCCGCAGCCAGCTCGTGGGGGAGCTTGGGAG 780  
Score \*\*\*\*\*

JN127373.1 CCTTTTCGGGCCCTATCGGTGTCCGCCTACGTGGCGGGTATCTTGGGGCTC 832  
Our sequence CCTTTTCGGGCCCTATCGGTGTCCGCCTACGTGGCGGGTATCTTGGGGCTC 832  
Score \*\*\*\*\*

JN127373.1 GGGGAGGTTTACTCGGGAGTCCTCACGGTTGGGGTCGC GTTGACGCGTCGGG 884  
Our sequence GGGGAGGTTTACTCGGGAGTCCTCACGGTTGGGGTCGC GTTGACGCGTCGGG 884  
Score \*\*\*\*\*

JN127373.1 TCTACCCGGTCCC GAACCTAACGTGTGCAGTAGAGTGTGAGTTAAAGTGGGA 936  
Our sequence TCTACCCGGTCCC GAACCTAACGTGTGCAGTAGAGTGTGAGTTAAAGTGGGA 936  
Score \*\*\*\*\*

JN127373.1 GAGTGAGTTTTGGAGATGGACTGAGCAGTTGGCCTCCAATTACTGGATTCTG 988  
Our sequence GAGTGAGTTTTGGAGATGGACTGAGCAGTTGGCCTCCAATTACTGGATTCTG 988  
Score \*\*\*\*\*

JN127373.1 GAATATCTCTGGAAGGTACCATTTGACTTTTTGGCGGGGAGTGATGAGCCTGA 1040  
Our sequence GAATATCTCTGGAAGGTACCATTTGACTTTTTGGCGGGGAGTGATGAGCCTGA 1040  
Score \*\*\*\*\*

JN127373.1 CACCCCTGTTGGTGTGCGTGGCGGCCCTACTCCTGCTAGAGCAAAGGCTTGT 1092  
Our sequence CACCCCTGTTGGTGTGCGTGGCGGCCCTACTCCTGCTAGAGCAAAGGCTTGT 1092  
Score \*\*\*\*\*

JN127373.1 TATGGTGTTCCTCCTGGTGACCATGGCTGGCATGTCGCAAGGCAGCCCGCT 1144  
Our sequence TATGGTGTTCCTCCTGGTGACCATGGCTGGCATGTCGCAAGGCAGCCCGCT 1144  
Score \*\*\*\*\*

JN127373.1 TCGGTCCTTGGATCACGCCCATTCGATCGTGGGCTGACCTGGCAGGCCTGCT 1196  
Our sequence TCGGTCCTTGGATCACGCCCATTCGATCGTGGGCTGACCTGGCAGGCCTGCT 1196  
Score \*\*\*\*\*

JN127373.1 CGTGCAGGGCAAACGGCTCGCGCGTGCCGACTGGGGAGAAGGTTTGGGAACG 1248  
Our sequence CGTGCAGGGCAAACGGCTCGCGCGTGCCGACTGGGGAGAAGGTTTGGGAACG 1248  
Score \*\*\*\*\*

JN127373.1 TGGGAACGTCACACTGTTGTGTGACTGCCCAACGGCCCTGGGTATGGTTG 1300  
Our sequence TGGGAACGTCACACTGTTGTGTGACTGCCCAACGGCCCTGGGTATGGTTG 1300  
Score \*\*\*\*\*

JN127373.1 CCAGCCGTTTGCCAAGCAGTCGGCTGGGGCGACCCTATCACTCATTGGAGCC 1352  
Our sequence CCAGCCGTTTGCCAAGCAGTCGGCTGGGGCGACCCTATCACTCATTGGAGCC 1352  
Score \*\*\*\*\*

JN127373.1 ACGGACAAAATCAGTGGCCCTCTCGTGTCCCAATATGTTTATGGTGCCGT 1404  
Our sequence ACGGACAAAATCAGTGGCCCTCTCGTGTCCCAATATGTTTATGGTGCCGT 1404  
Score \*\*\*\*\*

JN127373.1 TTCAGTGACCTGCGTGTGGGGTTCGTCTCTTGGTTTGCCTCCACTGGCGGG 1456  
Our sequence TTCAGTGACCTGCGTGTGGGGTTCGTCTCTTGGTTTGCCTCCACTGGCGGG 1456  
Score \*\*\*\*\*

JN127373.1 1508  
Our sequence 1508  
Score \*\*\*\*\*

JN127373.1 1560  
Our sequence 1560  
Score \*\*\*\*\*

JN127373.1 1612  
Our sequence 1612  
Score \*\*\*\*\*

JN127373.1 1664  
Our sequence 1664  
Score \*\*\*\*\*

JN127373.1 1716  
Our sequence 1716  
Score \*\*\*\*\*

JN127373.1 1768  
Our sequence 1768  
Score \*\*\*\*\*

JN127373.1 1820  
Our sequence 1820  
Score \*\*\*\*\*

JN127373.1 TGACCAAGATCCGGGACTCTCTACATTTGGTGAATGTCCCACACCAGCTAT 1872  
Our sequence TGACCAAGATCCGGGACTCTCTACATTTGGTGAATGTCCCACACCAGCTAT 1872  
Score \*\*\*\*\*

JN127373.1 AGAGCATCCCAGTGGGACGTTCTGGGTTCTTCCCTGGACAGCCGCCCTCAAC 1924  
Our sequence AGAGCATCCCAGTGGGACGTTCTGGGTTCTTCCCTGGACAGCCGCCCTCAAC 1924  
Score \*\*\*\*\*

JN127373.1 AACTGCATGCTTCTTGGCACTGAGGTGTCTGAGGCATTAGGTGGGGCTGGCT 1976  
Our sequence AACTGCATGCTTCTTGGCACTGAGGTGTCTGAGGCATTAGGTGGGGCTGGCT 1976  
Score \*\*\*\*\*

JN127373.1 TGACGGGGGGTTCCTACGAGCCCCTGGTGCAGGTGTTCTGGAGCTGATGGG 2028  
Our sequence TGACGGGGGGTTCCTACGAGCCCCTGGTGCAGGTGTTCTGGAGCTGATGGG 2028  
Score \*\*\*\*\*

JN127373.1 CCGCCGCAATCCAGTTTGTCCGGGGTTTGCATGGCTCTCCTCGGGCAGGCCT 2080  
Our sequence CCGCCGCAATCCAGTTTGTCCGGGGTTTGCATGGCTCTCCTCGGGCAGGCCT 2080  
Score \*\*\*\*\*

JN127373.1 GATGGGTTTATACATGTTTCAGGGGCACTTGCAGGAGGTGGATGCGGGCAACT 2132  
Our sequence GATGGGTTTATACATGTTTCAGGGGCACTTGCAGGAGGTGGATGCGGGCAACT 2132  
Score \*\*\*\*\*

JN127373.1 TCATTCCGCCCCACGCTGGCTGCTCCTGGATTTTGTATTTGTCCTGTTATA 2184  
Our sequence TCATTCCGCCCCACGCTGGCTGCTCCTGGATTTTGTATTTGTCCTGTTATA 2184  
Score \*\*\*\*\*

JN127373.1 CCTGATGAAGCTGGCTGAGGCTAGGTTGGTTCCGCTCATACTTCTCCTGCTA 2236  
Our sequence CCTGATGAAGCTGGCTGAGGCTAGGTTGGTTCCGCTCATACTTCTCCTGCTA 2236  
Score \*\*\*\*\*

JN127373.1 TGGTGGTGGGTGAACCAGTTGGCGGTCCTCGGACTGCCGGCTGCCACGCCG 2288  
Our sequence TGGTGGTGGGTGAACCAGTTGGCGGTCCTCGGACTGCCGGCTGCCACGCCG 2288  
Score \*\*\*\*\*

JN127373.1 CCGTGGCAGGGGAGGTGTTTGGCGGGCCAGCCCTGTCATGGTGTCTGGGCCT 2340  
Our sequence CCGTGGCAGGGGAGGTGTTTGGCGGGCCAGCCCTGTCATGGTGTCTGGGCCT 2340  
Score \*\*\*\*\*

JN127373.1 CCCC TTCGTGAGCATGATCCTGGGTCTAGCAAACCTGGTGTGTTGACTTCCGT 2392  
Our sequence CCCC TTCGTGAGCATGATCCTGGGTCTAGCAAACCTGGTGTGTTGACTTCCGT 2392  
Score \*\*\*\*\*

JN127373.1 TGGATGGGGCCCCAGCGCCTGATGTTTCTCGTGTTGTGGAAGCTCGCTCGGG 2444  
Our sequence TGGATGGGGCCCCAGCGCCTGATGTTTCTCGTGTTGTGGAAGCTCGCTCGGG 2444  
Score \*\*\*\*\*

JN127373.1 GAGCCTTCCCGCTGGCACTTCTGATGGGGATCTCGGCACCCGCGGCCGCAC 2496  
Our sequence GAGCCTTCCCGCTGGCACTTCTGATGGGGATCTCGGCACCCGCGGCCGCAC 2496  
Score \*\*\*\*\*

JN127373.1 CTCAGTGCTCGGCGCCGAATTCTGCTTCGATGTCACATTCGAGGTGGACACT 2548  
Our sequence CTCAGTGCTCGGCGCCGAATTCTGCTTCGATGTCACATTCGAGGTGGACACT 2548  
Score \*\*\*\*\*

JN127373.1 TCGGTTCTGGGATGGGTGGTGGCCAGCGTGGTAGCTTGGGCCATAGCGCTTC 2600  
Our sequence TCGGTTCTGGGATGGGTGGTGGCCAGCGTGGTAGCTTGGGCCATAGCGCTTC 2600  
Score \*\*\*\*\*

JN127373.1 TGAGCTCAATGAGTGCAGGAGGGTGAAGCACAAAGCTGTGATTTACAGGAC 2652  
Our sequence TGAGCTCAATGAGTGCAGGAGGGTGAAGCACAAAGCTGTGATTTACAGGAC 2652  
Score \*\*\*\*\*

JN127373.1 GTGGTGC AAGGGGTATCAGGCGGTACGTCAACGGGTGGTTCGCAGCCCCCTC 2704  
Our sequence GTGGTGC AAGGGGTATCAGGCGGTACGTCAACGGGTGGTTCGCAGCCCCCTC 2704  
Score \*\*\*\*\*

JN127373.1 GGGGAGGGGC GGCC TACTAAGCCTTTGACTTTTCGCTTGGTGC TTGGCCTCGT 2756  
Our sequence GGGGAGGGGC GGCC TACTAAGCCTTTGACTTTTCGCTTGGTGC TTGGCCTCGT 2756  
Score \*\*\*\*\*

JN127373.1 ACATCTGGCCTGACGCGGTGATGATGGTGGTGGTGGCTATGGTGC TTCTCTT 2808  
Our sequence ACATCTGGCCTGACGCGGTGATGATGGTGGTGGTGGCTATGGTGC TTCTCTT 2808  
Score \*\*\*\*\*

JN127373.1 CGGC TTGTT CGATGCGTTGGACTGGGC TTAGAGGAGCTCCTGGTCTCTCGG 2860  
Our sequence CGGC TTGTT CGATGCGTTGGACTGGGC TTAGAGGAGCTCCTGGTCTCTCGG 2860  
Score \*\*\*\*\*

JN127373.1 CCCTCGTTGCGCCGATTGGCTCGGGTGGTTGAGTGTTGTGTGACGGCTGGTG 2912  
Our sequence CCCTCGTTGCGCCGATTGGCTCGGGTGGTTGAGTGTTGTGTGACGGCTGGTG 2912  
Score \*\*\*\*\*



JN127373.1 AAAGGGCCACTACTGTGAGGTTGGTCTCCAAGATGTGCCGAGGGGGGTCTA 2964  
Our sequence AAAGGGCCACTACTGTGAGGTTGGTCTCCAAGATGTGCCGAGGGGGGTCTA 2964  
Score \*\*\*\*\*

JN127373.1 TTTGTTCCGACCATATGGGCTCCTTCTCGCGCTCTGTCAAGGAGCGCTTGCTG 3016  
Our sequence TTTGTTCCGACCATATGGGCTCCTTCTCGCGCTCTGTCAAGGAGCGCTTGCTG 3016  
Score \*\*\*\*\*

JN127373.1 GAATGGGACGCGGGCTCTTGAACCCCTGTCATTACCAGGACGGACTGTCGCA 3068  
Our sequence GAATGGGACGCGGGCTCTTGAACCCCTGTCATTACCAGGACGGACTGTCGCA 3068  
Score \*\*\*\*\*

JN127373.1 TCATAAGAGATGCCGCCAGGACCCTCTCGTGGGCCAGTGTGTCATGGGCTT 3120  
Our sequence TCATAAGAGATGCCGCCAGGACCCTCTCGTGGGCCAGTGTGTCATGGGCTT 3120  
Score \*\*\*\*\*

JN127373.1 GCCCGTGGTAGCACGTCCGGCGGATGAGGTGCTGATAGGTGTC TTCCAAGAT 3172  
Our sequence GCCCGTGGTAGCACGTCCGGCGGATGAGGTGCTGATAGGTGTC TTCCAAGAT 3172  
Score \*\*\*\*\*

JN127373.1 GTGAACCATTTGCCTCCC GGGTTTGTCCCAACCGCGCCAGTTGTCATCCGGC 3224  
Our sequence GTGAACCATTTGCCTCCC GGGTTTGTCCCAACCGCGCCAGTTGTCATCCGGC 3224  
Score \*\*\*\*\*

JN127373.1 GGTGCGGGAAGGGCTTTCTCGGAGTCACAAAGGCAGCCTTGACGGGTCGGGA 3276  
Our sequence GGTGCGGGAAGGGCTTTCTCGGAGTCACAAAGGCAGCCTTGACGGGTCGGGA 3276  
Score \*\*\*\*\*

JN127373.1 CCCTGATCTACACCCAGGGAACGTCATGGTGTGGGGACGGCTACCTCGCGC 3328  
Our sequence CCCTGATCTACACCCAGGGAACGTCATGGTGTGGGGACGGCTACCTCGCGC 3328  
Score \*\*\*\*\*

JN127373.1 AGCATGGGCACATGTCTGAACGGGTTGCTGTTCACTACTTTCCATGGGGCTT 3380  
Our sequence AGCATGGGCACATGTCTGAACGGGTTGCTGTTCACTACTTTCCATGGGGCTT 3380  
Score \*\*\*\*\*

JN127373.1 CTTCCC GAACCATCGCCACGCCCGTGGGGGCCCTTAATCCCAGGTGGTGGTC 3432  
Our sequence CTTCCC GAACCATCGCCACGCCCGTGGGGGCCCTTAATCCCAGGTGGTGGTC 3432  
Score \*\*\*\*\*

JN127373.1 GGCCAGTGATGATGTGACCGTGTACCCTCTCCCAGACGGGGCAACCTCGTTA 3484  
Our sequence GGCCAGTGATGATGTGACCGTGTACCCTCTCCCAGACGGGGCAACCTCGTTA 3484  
Score \*\*\*\*\*

JN127373.1 GCGCCTTGACATGCCAAGCTGAGTCCTGTTGGGTCATCAGATCTGACGGGG 3536  
Our sequence GCGCCTTGACATGCCAAGCTGAGTCCTGTTGGGTCATCAGATCTGACGGGG 3536  
Score \*\*\*\*\*

JN127373.1 CCCTTTGCCATGGCTTGTCCAAGGGGGACAAAGGTAGAACTGGACGTGGCCAT 3588  
Our sequence CCCTTTGCCATGGCTTGTCCAAGGGGGACAAAGGTAGAACTGGACGTGGCCAT 3588  
Score \*\*\*\*\*

JN127373.1 GGAGGTTTCGGACTTCCGTGGGTCTGCTGGGTCCCTGTCCTTTGCGACGAG 3640  
Our sequence GGAGGTTTCGGACTTCCGTGGGTCTGCTGGGTCCCTGTCCTTTGCGACGAG 3640  
Score \*\*\*\*\*

JN127373.1 GGGCACGCAGTAGGAATGCTGGTGTTCAGTGCTCCATTCTGGCGGGAGGGTTA 3692  
Our sequence GGGCACGCAGTAGGAATGCTGGTGTTCAGTGCTCCATTCTGGCGGGAGGGTTA 3692  
Score \*\*\*\*\*

JN127373.1 GGGCTGCAAGGTTTACAAGGCCGTGGACCCAAGTTCCAACAGACGCCAAGAC 3744  
Our sequence GGGCTGCAAGGTTTACAAGGCCGTGGACCCAAGTTCCAACAGACGCCAAGAC 3744  
Score \*\*\*\*\*

JN127373.1 CACTACCGAACCCCCGCCGGTGCCGGC AAAAGGAGTTTTCAAAGAGGCCCCCG 3796  
Our sequence CACTACCGAACCCCCGCCGGTGCCGGC AAAAGGAGTTTTCAAAGAGGCCCCCG 3796  
Score \*\*\*\*\*

JN127373.1 TTGTTTATGCCACGGGGGCCGGGAAGAGCACCCGGGTCCCCCTGGAATATG 3848  
Our sequence TTGTTTATGCCACGGGGGCCGGGAAGAGCACCCGGGTCCCCCTGGAATATG 3848  
Score \*\*\*\*\*

JN127373.1 GCAACATGGGGCAC AAGGCTTTGATTCTCAACCCGTCGGTGGCCACCGTGAG 3900  
Our sequence GCAACATGGGGCAC AAGGCTTTGATTCTCAACCCGTCGGTGGCCACCGTGAG 3900  
Score \*\*\*\*\*

JN127373.1 GGCCATGGGCCCTTACATGGAGAAGCTGGCGGGCAAACATCCAAGCATCTAC 3952  
Our sequence GGCCATGGGCCCTTACATGGAGAAGCTGGCGGGCAAACATCCAAGCATCTAC 3952  
Score \*\*\*\*\*

JN127373.1 TGTGGGCACGATACAAC TGCCTTCACGAGAATTACTGATTTCGCCCCCTGACGT 4004  
Our sequence TGTGGGCACGATACAAC TGCCTTCACGAGAATTACTGATTTCGCCCCCTGACGT 4004  
Score \*\*\*\*\*

JN127373.1 ACTCGACCTATGGGAGGTTTCCTTGCCAACCCTAGGCAGATGCTACGGGGCGT 4056  
Our sequence ACTCGACCTATGGGAGGTTTCCTTGCCAACCCTAGGCAGATGCTACGGGGCGT 4056  
Score \*\*\*\*\*

JN127373.1 GTCGGTGGTAATCTGTGATGAGTGCCACAGTCATGACTCAACGGTGTTCCTG 4108  
Our sequence GTCGGTGGTAATCTGTGATGAGTGCCACAGTCATGACTCAACGGTGTTCCTG 4108  
Score \*\*\*\*\*

JN127373.1 GGGATTGGGCGCGTCCGGGAGTTGGCTCGTGGGTGTGGGGTACAGCTAGTGC 4160  
Our sequence GGGATTGGGCGCGTCCGGGAGTTGGCTCGTGGGTGTGGGGTACAGCTAGTGC 4160  
Score \*\*\*\*\*

JN127373.1 TCTACGCTACAGCCACACCTCCCGGGTGCGCTATGACTCAGCACCCCTCCAT 4212  
Our sequence TCTACGCTACAGCCACACCTCCCGGGTGCGCTATGACTCAGCACCCCTCCAT 4212  
Score \*\*\*\*\*

JN127373.1 CATTGAGACAAAGCTGGACGTTGGTGAGATCCCCTTTTATGGGCATGGCATT 4264  
Our sequence CATTGAGACAAAGCTGGACGTTGGTGAGATCCCCTTTTATGGGCATGGCATT 4264  
Score \*\*\*\*\*

JN127373.1 CCCTTGGAGCGGATGCGGACCGGCAGACACCTCGTATTTTGTCACTCAAAGG 4316  
Our sequence CCCTTGGAGCGGATGCGGACCGGCAGACACCTCGTATTTTGTCACTCAAAGG 4316  
Score \*\*\*\*\*

JN127373.1 CAGAGTGCAGCGACTTGTGCCAGTTCTCTTCCAGGGGGTCAATGCCAT 4368  
Our sequence CAGAGTGCAGCGACTTGTGCCAGTTCTCTTCCAGGGGGTCAATGCCAT 4368  
Score \*\*\*\*\*

JN127373.1 TGCTTATTATCGGGGGAAGGACAGTTCCATCATCAAGGACGGTGATCTCGTG 4420  
Our sequence TGCTTATTATCGGGGGAAGGACAGTTCCATCATCAAGGACGGTGATCTCGTG 4420  
Score \*\*\*\*\*

JN127373.1 GTTTGCGCTACAGACGCGCTCTCCACGGGGTACACGGGAAACTTCGATTCTG 4472  
Our sequence GTTTGCGCTACAGACGCGCTCTCCACGGGGTACACGGGAAACTTCGATTCTG 4472  
Score \*\*\*\*\*

JN127373.1 TCACCGACTGTGGGTTGGTAGTGGAGGAGGTCGTTGAGGTGACCCTTGATCC 4524  
Our sequence TCACCGACTGTGGGTTGGTAGTGGAGGAGGTCGTTGAGGTGACCCTTGATCC 4524  
Score \*\*\*\*\*

JN127373.1 CACTATCACCATCTCCCTGCGAACGGTGCCTGCTTCGGCTGAACGTTCGATG 4576  
Our sequence CACTATCACCATCTCCCTGCGAACGGTGCCTGCTTCGGCTGAACGTTCGATG 4576  
Score \*\*\*\*\*

JN127373.1 CAAAGGCAGGGACGCACGGGTAGGGGCCGGTCTGGGCGGTACTACTACGCGG 4628  
Our sequence CAAAGGCAGGGACGCACGGGTAGGGGCCGGTCTGGGCGGTACTACTACGCGG 4628  
Score \*\*\*\*\*

JN127373.1 GGGTCGGTAAGGCCCCCGCTGGGGTGGTGCGGTCCGGGCCGGTCTGGTCGGC 4680  
Our sequence GGGTCGGTAAGGCCCCCGCTGGGGTGGTGCGGTCCGGGCCGGTCTGGTCGGC 4680  
Score \*\*\*\*\*

JN127373.1 GGTGGAAGCTGGAGTGACCTGGTATGGTATGGAGCCTGATCTGACAGCAAAC 4732  
Our sequence GGTGGAAGCTGGAGTGACCTGGTATGGTATGGAGCCTGATCTGACAGCAAAC 4732  
Score \*\*\*\*\*

JN127373.1 CTTCTGAGACTTTTACGACGACTGCCCTTACACCGCAGCCGTCCAGCTGACA 4784  
Our sequence CTTCTGAGACTTTTACGACGACTGCCCTTACACCGCAGCCGTCCAGCTGACA 4784  
Score \*\*\*\*\*

JN127373.1 TTGGGGAAGCCGCGGTGTTCTTTGCGGGGCTTGCCCCCTCAGGATGCATCC 4836  
Our sequence TTGGGGAAGCCGCGGTGTTCTTTGCGGGGCTTGCCCCCTCAGGATGCATCC 4836  
Score \*\*\*\*\*

JN127373.1 CGATGTTAGCTGGGCAAAAAGTGC GCGGCGTCAATTGGCCCCCTCCTGGTGGGT 4888  
Our sequence CGATGTTAGCTGGGCAAAAAGTGC GCGGCGTCAATTGGCCCCCTCCTGGTGGGT 4888  
Score \*\*\*\*\*

JN127373.1 GTTCAGCGGACCATGTGCCGGGAAACACTGTCTCCCGGACCATCGGATGACC 4940  
Our sequence GTTCAGCGGACCATGTGCCGGGAAACACTGTCTCCCGGACCATCGGATGACC 4940  
Score \*\*\*\*\*

JN127373.1 CCCAGTGGGCTGGTCTGAAGGGCCCAAATCCTGTCCCTCTACTGCTGAGGTG 4992  
Our sequence CCCAGTGGGCTGGTCTGAAGGGCCCAAATCCTGTCCCTCTACTGCTGAGGTG 4992  
Score \*\*\*\*\*

JN127373.1 GGGCAACGATTTGCCATCCAAAGTGGCCGGCCATCACATTGTGGACGACTTG 5044  
Our sequence GGGCAACGATTTGCCATCCAAAGTGGCCGGCCATCACATTGTGGACGACTTG 5044  
Score \*\*\*\*\*

JN127373.1 GTCCGTCCCTGGGCGTTGCGGAGGGTTATGTCCGCTGC GACGCGGGGCCCA 5096  
Our sequence GTCCGTCCCTGGGCGTTGCGGAGGGTTATGTCCGCTGC GACGCGGGGCCCA 5096  
Score \*\*\*\*\*

JN127373.1 TCTTAATGGTGGGCCTCGCTATCGCGGGGGGGATGATCTACGCTTCGTACAC 5148  
Our sequence TCTTAATGGTGGGCCTCGCTATCGCGGGGGGGATGATCTACGCTTCGTACAC 5148  
Score \*\*\*\*\*

JN127373.1 AGGATCACTCGTGGTGGTAACAGACTGGGATGTAAAGGGGGGTGGCAACCCC 5200  
Our sequence AGGATCACTCGTGGTGGTAACAGACTGGGATGTAAAGGGGGGTGGCAACCCC 5200  
Score \*\*\*\*\*

JN127373.1 CTTTATCGGAGTGGTGACCAAGCCACCCCGCAGCCCGTCGTGCAGGTGCCCC 5252  
Our sequence CTTTATCGGAGTGGTGACCAAGCCACCCCGCAGCCCGTCGTGCAGGTGCCCC 5252  
Score \*\*\*\*\*

JN127373.1 CGGTAGACCACCGGCCGGGGGAGAATCTGCTCCGTCGGACGCCAAGACAGT 5304  
Our sequence CGGTAGACCACCGGCCGGGGGAGAATCTGCTCCGTCGGACGCCAAGACAGT 5304  
Score \*\*\*\*\*

JN127373.1 GACAGATCGGGTGGCGGCCATTCAAGTGGACTGTGATTGGTCAGTTATGACC 5356  
Our sequence GACAGATCGGGTGGCGGCCATTCAAGTGGACTGTGATTGGTCAGTTATGACC 5356  
Score \*\*\*\*\*

JN127373.1 CTGTCGATCGGGGAAGTACTGTCCTTGGCTCAGGCTAAGACTGCCGAGGCCT 5408  
Our sequence CTGTCGATCGGGGAAGTACTGTCCTTGGCTCAGGCTAAGACTGCCGAGGCCT 5408  
Score \*\*\*\*\*

JN127373.1 ACACAGCAACCGCCAAGTGGCTCGCTGGCTGCTACACGGGGACGCCGGCCGT 5460  
Our sequence ACACAGCAACCGCCAAGTGGCTCGCTGGCTGCTACACGGGGACGCCGGCCGT 5460  
Score \*\*\*\*\*

JN127373.1 CCCCACAGTTTCAATTGTGGACAAGCTCTTTGCCGGC GGGTGGGC GGCGGTG 5512  
Our sequence CCCCACAGTTTCAATTGTGGACAAGCTCTTTGCCGGC GGGTGGGC GGCGGTG 5512  
Score \*\*\*\*\*

JN127373.1 GTTGGCCACTGCCACAGCGTCATAGCTGCCGGC GGTGGCTGCCTACGGGGCTT 5564  
Our sequence GTTGGCCACTGCCACAGCGTCATAGCTGCCGGC GGTGGCTGCCTACGGGGCTT 5564  
Score \*\*\*\*\*

JN127373.1 CTAGGAGCCCTCCGTTGGCTGCCGCTGCCTCCTACCTTATGGGATTGGGCGT 5616  
Our sequence CTAGGAGCCCTCCGTTGGCTGCCGCTGCCTCCTACCTTATGGGATTGGGCGT 5616  
Score \*\*\*\*\*

JN127373.1 CGGAGGCAATGCTCAGACGCGCTTGGCTTCTGCTCTCCTTCTGGGGGCTGCT 5668  
Our sequence CGGAGGCAATGCTCAGACGCGCTTGGCTTCTGCTCTCCTTCTGGGGGCTGCT 5668  
Score \*\*\*\*\*

JN127373.1 GGTACC GCCCTGGGCACTCCC GTCGTTGGTTTGACCATGGC GGGGGCGTTCA 5720  
Our sequence GGTACC GCCCTGGGCACTCCC GTCGTTGGTTTGACCATGGC GGGGGCGTTCA 5720  
Score \*\*\*\*\*

JN127373.1 TGGGTGGCGCTAGCGTCTCCCCATCCTTGGTGACCATTTTACTGGGAGCCGT 5772  
Our sequence TGGGTGGCGCTAGCGTCTCCCCATCCTTGGTGACCATTTTACTGGGAGCCGT 5772  
Score \*\*\*\*\*

JN127373.1 GGGTGGTTGGGAGGGCGTGGTCAACGCGGGCCAGCCTTGTCTTTGACTTCATG 5824  
Our sequence GGGTGGTTGGGAGGGCGTGGTCAACGCGGGCCAGCCTTGTCTTTGACTTCATG 5824  
Score \*\*\*\*\*



JN127373.1 GCAGGGAAACTTTTCATCAGAGGACCTGTGGTATGCTATCCCAGGTCCTCAGGA 5876  
Our sequence GCAGGGAAACTTTTCATCAGAGGACCTGTGGTATGCTATCCCAGGTCCTCAGGA 5876  
Score \*\*\*\*\*

JN127373.1 GCCCCGGGGCGGGCCTTTCGGGGATCGCTCTTGGACTTGTGTTGTACTCAGC 5928  
Our sequence GCCCCGGGGCGGGCCTTTCGGGGATCGCTCTTGGACTTGTGTTGTACTCAGC 5928  
Score \*\*\*\*\*

JN127373.1 CAACAATCAGGCACCTACCACATGGTTGAACCGTCTGCTGACCACGTTGCCG 5980  
Our sequence CAACAATCAGGCACCTACCACATGGTTGAACCGTCTGCTGACCACGTTGCCG 5980  
Score \*\*\*\*\*

JN127373.1 CGGTCCTCATGCATCCCCGACAGTTACTTTTCAGCAAGCTGACTACTGTGACA 6032  
Our sequence CGGTCCTCATGCATCCCCGACAGTTACTTTTCAGCAAGCTGACTACTGTGACA 6032  
Score \*\*\*\*\*

JN127373.1 AGGTCTCGGCTGTACTCCGGCGCCTGAGCCTCACACGAACTGTGGTGGCCCT 6084  
Our sequence AGGTCTCGGCTGTACTCCGGCGCCTGAGCCTCACACGAACTGTGGTGGCCCT 6084  
Score \*\*\*\*\*

JN127373.1 GGTCAACAGGGAACCAAAAAGTCGATGAGGTGCAGGTCCGATACGTCTGGGAT 6136  
Our sequence GGTCAACAGGGAACCAAAAAGTCGATGAGGTGCAGGTCCGATACGTCTGGGAT 6136  
Score \*\*\*\*\*

JN127373.1 TTGTGGGAGTGGATCATGCGCCAGGTGCGTATGGTGATGGCCAGACTCCGGG 6188  
Our sequence TTGTGGGAGTGGATCATGCGCCAGGTGCGTATGGTGATGGCCAGACTCCGGG 6188  
Score \*\*\*\*\*

JN127373.1 CCCTCTGCCCGTGGTGTCTTACCCTATGGCACTGCGGGGAGGGGTGGTC 6240  
Our sequence CCCTCTGCCCGTGGTGTCTTACCCTATGGCACTGCGGGGAGGGGTGGTC 6240  
Score \*\*\*\*\*

JN127373.1 TGGAGAATGGCTGTTGGATGGGCATGTTGAGAGTCGCTGCCTTTGTGGGTGC 6292  
Our sequence TGGAGAATGGCTGTTGGATGGGCATGTTGAGAGTCGCTGCCTTTGTGGGTGC 6292  
Score \*\*\*\*\*

JN127373.1 GTCATCACAGGCGACGTGTTTAATGGGCAACTCAAAGAACCAGTTTATTCCA 6344  
Our sequence GTCATCACAGGCGACGTGTTTAATGGGCAACTCAAAGAACCAGTTTATTCCA 6344  
Score \*\*\*\*\*

JN127373.1 CAAAGCTGTGCCGACACTATTGGATGGGGACCGTGCCGGTCAACATGCTGGG 6396  
Our sequence CAAAGCTGTGCCGACACTATTGGATGGGGACCGTGCCGGTCAACATGCTGGG 6396  
Score \*\*\*\*\*

JN127373.1 ATACGGGGAAACCTCGCCCTCCTGGCCTCTGACACCCCGAAGGTGGTACCT 6448  
Our sequence ATACGGGGAAACCTCGCCCTCCTGGCCTCTGACACCCCGAAGGTGGTACCT 6448  
Score \*\*\*\*\*

JN127373.1 TTCGGGACGTCGGGCTGGGC GGAGGTGGTGGTGACCCCCACCCACGTGGTGA 6500  
Our sequence TTCGGGACGTCGGGCTGGGC GGAGGTGGTGGTGACCCCCACCCACGTGGTGA 6500  
Score \*\*\*\*\*

JN127373.1 TCCGGCGCACCTCGTCTACAAGTTGTTGCGCCAGCAAATTC TTTCGGCCGC 6552  
Our sequence TCCGGCGCACCTCGTCTACAAGTTGTTGCGCCAGCAAATTC TTTCGGCCGC 6552  
Score \*\*\*\*\*

JN127373.1 TGTAGCTGAGCCCTACTACGTCGACGGCATTCCGGTCTCATGGGACGCTGAC 6604  
Our sequence TGTAGCTGAGCCCTACTACGTCGACGGCATTCCGGTCTCATGGGACGCTGAC 6604  
Score \*\*\*\*\*

JN127373.1 GCGAGAGCACCAGCGATGGTCTATGGCCCCGGGCAAAGTGTACCATTGACG 6656  
Our sequence GCGAGAGCACCAGCGATGGTCTATGGCCCCGGGCAAAGTGTACCATTGACG 6656  
Score \*\*\*\*\*

JN127373.1 GGGAGCGCTACACCCTGCCGCACCAGCTGCGGCTTAGGAATGTGGCGCCCTC 6708  
Our sequence GGGAGCGCTACACCCTGCCGCACCAGCTGCGGCTTAGGAATGTGGCGCCCTC 6708  
Score \*\*\*\*\*

JN127373.1 TGAGGTTTCATCCGAGGTGTCCATTGACATTGGGACGGAGACTGAAGACTCA 6760  
Our sequence TGAGGTTTCATCCGAGGTGTCCATTGACATTGGGACGGAGACTGAAGACTCA 6760  
Score \*\*\*\*\*

JN127373.1 GAACTGACTGAGGCCGACTTGCCGCCGGCGGCTGCTGCCCTCCAGGCTATCG 6812  
Our sequence GAACTGACTGAGGCCGACTTGCCGCCGGCGGCTGCTGCCCTCCAGGCTATCG 6812  
Score \*\*\*\*\*

JN127373.1 AGAATGCTGCGAGAATTC TTGAGCCTCACATTGATGTCATCATGGAGGACTG 6864  
Our sequence AGAATGCTGCGAGAATTC TTGAGCCTCACATTGATGTCATCATGGAGGACTG 6864  
Score \*\*\*\*\*

JN127373.1 CAGTACACCCTCTCTCTGTGGTAGTAGCCGAGAGATGCCAGTGTGGGGCGAA 6916  
Our sequence CAGTACACCCTCTCTCTGTGGTAGTAGCCGAGAGATGCCAGTGTGGGGCGAA 6916  
Score \*\*\*\*\*

JN127373.1 GACATCCCCCGCACTCCATCGCCAGCACATTATCTCGGTTACCGAGAGCAGCT 6968  
Our sequence GACATCCCCCGCACTCCATCGCCAGCACATTATCTCGGTTACCGAGAGCAGCT 6968  
Score \*\*\*\*\*

JN127373.1 CAGATGAAAAGACCCCGTGGTGTCTTCCTCGCAGGAGGATACCCCGTCCTC 7020  
Our sequence CAGATGAAAAGACCCCGTGGTGTCTTCCTCGCAGGAGGATACCCCGTCCTC 7020  
Score \*\*\*\*\*

JN127373.1 TGACTCATTGGAAGTCATTCCAGAGACGGAGACGGCCGGAGGGGATGACAAT 7072  
Our sequence TGACTCATTGGAAGTCATTCCAGAGACGGAGACGGCCGGAGGGGATGACAAT 7072  
Score \*\*\*\*\*

JN127373.1 GTCTTCAACGTGGCTCTTTCCGTATTAAGCCTTGTTCCACAGAGCGATG 7124  
Our sequence GTCTTCAACGTGGCTCTTTCCGTATTAAGCCTTGTTCCACAGAGCGATG 7124  
Score \*\*\*\*\*

JN127373.1 CCACACGCAAGCTAACGGTGAAGATGTCGTGCTGCGTGGAGAAGAGCGTCAC 7176  
Our sequence CCACACGCAAGCTAACGGTGAAGATGTCGTGCTGCGTGGAGAAGAGCGTCAC 7176  
Score \*\*\*\*\*

JN127373.1 GCGCTTCTTTTCCTTGGGGTTGACCGTGGCTGACGTGGCTAGCCTGTGCGAA 7228  
Our sequence GCGCTTCTTTTCCTTGGGGTTGACCGTGGCTGACGTGGCTAGCCTGTGCGAA 7228  
Score \*\*\*\*\*

JN127373.1 ATGGAGATCCAGAACCATACAGCCTATTGTGACAAGGTGCGCACTCCGCTTG 7280  
Our sequence ATGGAGATCCAGAACCATACAGCCTATTGTGACAAGGTGCGCACTCCGCTTG 7280  
Score \*\*\*\*\*

JN127373.1 AATTGCAGGTTGGGTGCTTGGTGGGCAATGAACTTACCTTTGAATGTGACAA 7332  
Our sequence AATTGCAGGTTGGGTGCTTGGTGGGCAATGAACTTACCTTTGAATGTGACAA 7332  
Score \*\*\*\*\*

JN127373.1 GTGTGAGGCTAGGCAAGAGACCTTGGCTTCTTTCTCCTACATCTGGTCTGGC 7384  
Our sequence GTGTGAGGCTAGGCAAGAGACCTTGGCTTCTTTCTCCTACATCTGGTCTGGC 7384  
Score \*\*\*\*\*

JN127373.1 GTGCCGCTCACGCGGGCCACTCCGGCCAAGCCCCCTGTGGTGAGGCCGGTTG 7436  
Our sequence GTGCCGCTCACGCGGGCCACTCCGGCCAAGCCCCCTGTGGTGAGGCCGGTTG 7436  
Score \*\*\*\*\*

JN127373.1 GCTCGTTGTTAGTGGCTGACACCACCAAGGTGTATGTCACCAATCCAGACAA 7488  
Our sequence GCTCGTTGTTAGTGGCTGACACCACCAAGGTGTATGTCACCAATCCAGACAA 7488  
Score \*\*\*\*\*

JN127373.1 CGTGGGGAGGAGAGTGGACAAGGTTACCTTCTGGCGTGCTCCCAGGGTTCAC 7540  
Our sequence CGTGGGGAGGAGAGTGGACAAGGTTACCTTCTGGCGTGCTCCCAGGGTTCAC 7540  
Score \*\*\*\*\*

JN127373.1 GACAAATTCCTTGTGGACTCTATCGAGCGCGCGAGAAAAGGCAGCTCAAGCCT 7592  
Our sequence GACAAATTCCTTGTGGACTCTATCGAGCGCGCGAGAAAAGGCAGCTCAAGCCT 7592  
Score \*\*\*\*\*

JN127373.1 GCCTAAGCATGGGTTACACTTATGAGGAGGC AATAAGGACTGTTAGGCCACA 7644  
Our sequence GCCTAAGCATGGGTTACACTTATGAGGAGGC AATAAGGACTGTTAGGCCACA 7644  
Score \*\*\*\*\*

JN127373.1 TGCTGCCATGGGCTGGGGATCTAAGGTGTCGGTCAAGGACCTCGCCACCCCT 7696  
Our sequence TGCTGCCATGGGCTGGGGATCTAAGGTGTCGGTCAAGGACCTCGCCACCCCT 7696  
Score \*\*\*\*\*

JN127373.1 GCGGGGAAGATGGCTGTCCATGACCGACTTCAGGAGATACTTGAAGGGACTC 7748  
Our sequence GCGGGGAAGATGGCTGTCCATGACCGACTTCAGGAGATACTTGAAGGGACTC 7748  
Score \*\*\*\*\*

JN127373.1 CGGTCCCATTTACCCCTGACTGTGAAAAAGGAGGTGTTCTTCAAAGACCGTAA 7800  
Our sequence CGGTCCCATTTACCCCTGACTGTGAAAAAGGAGGTGTTCTTCAAAGACCGTAA 7800  
Score \*\*\*\*\*

JN127373.1 GGAGGAGAAGGCCCCCCGCCTCATTGTGTTCCCTCCCCTGGACTTCCGGATA 7852  
Our sequence GGAGGAGAAGGCCCCCCGCCTCATTGTGTTCCCTCCCCTGGACTTCCGGATA 7852  
Score \*\*\*\*\*

JN127373.1 GCTGAAAAGTTAATCCTGGGGGACCCGGGTCGAGTGGCCAAGGC GGTTGG 7904  
Our sequence GCTGAAAAGTTAATCCTGGGGGACCCGGGTCGAGTGGCCAAGGC GGTTGG 7904  
Score \*\*\*\*\*

JN127373.1 GGGGGGCTTACGCCTTCCAGTACACCCCAAACCAGCGGGTTAAGGAGATGCT 7956  
Our sequence GGGGGGCTTACGCCTTCCAGTACACCCCAAACCAGCGGGTTAAGGAGATGCT 7956  
Score \*\*\*\*\*

JN127373.1 CAAGCTGTGGGAATCAAAGAAAACCCCTTGCGCCATCTGCGTGGACGCGACG 8008  
Our sequence CAAGCTGTGGGAATCAAAGAAAACCCCTTGCGCCATCTGCGTGGACGCGACG 8008  
Score \*\*\*\*\*

JN127373.1 TGCTTCGACAGTAGCATTACTGAAGAGGACGTGGCGCTGGAGACGGAGCTAT 8060  
Our sequence TGCTTCGACAGTAGCATTACTGAAGAGGACGTGGCGCTGGAGACGGAGCTAT 8060  
Score \*\*\*\*\*

JN127373.1 ATGCTCTGGCTTCAGACCACCCAGAGTGGGTGCGAGCCCTGGGGAAATACTA 8112  
Our sequence ATGCTCTGGCTTCAGACCACCCAGAGTGGGTGCGAGCCCTGGGGAAATACTA 8112  
Score \*\*\*\*\*

JN127373.1 TGCTTCAGGCACCATGGTTACCCCGGAAGGGGTTCCCGTCGGTGAGAGGTAC 8164  
Our sequence TGCTTCAGGCACCATGGTTACCCCGGAAGGGGTTCCCGTCGGTGAGAGGTAC 8164  
Score \*\*\*\*\*

JN127373.1 GTAGATCCTCAGGGGTTCTGACCACCAGCGCGAGCAACTGCTTGACCTGCT 8216  
Our sequence GTAGATCCTCAGGGGTTCTGACCACCAGCGCGAGCAACTGCTTGACCTGCT 8216  
Score \*\*\*\*\*

JN127373.1 ACATTAAGGTGTCAGCCGCCTGCCAGAGAGTGGGACTGAAAAATGTCTCGCT 8268  
Our sequence ACATTAAGGTGTCAGCCGCCTGCCAGAGAGTGGGACTGAAAAATGTCTCGCT 8268  
Score \*\*\*\*\*

JN127373.1 TCTCATCGCGGGCGATGACTGTCTGATCATATGCGAACGGCCAGTGTGCGAC 8320  
Our sequence TCTCATCGCGGGCGATGACTGTCTGATCATATGCGAACGGCCAGTGTGCGAC 8320  
Score \*\*\*\*\*

JN127373.1 CCGAGCGAAGCTCTGGGCAGAGCCCTAGCGAGCTATGGGTACGCGTGCGAAC 8372  
Our sequence CCGAGCGAAGCTCTGGGCAGAGCCCTAGCGAGCTATGGGTACGCGTGCGAAC 8372  
Score \*\*\*\*\*

JN127373.1 CTTCTGATCATGCATCATTGGACACGGCCCCCTTCTGCTCCACTTTGGCTTGC 8424  
Our sequence CTTCTGATCATGCATCATTGGACACGGCCCCCTTCTGCTCCACTTTGGCTTGC 8424  
Score \*\*\*\*\*

JN127373.1 TGAGTGCAATGCAGATGGGAAGCGCCATTTCTTCCTGACAACGGACTTTTGG 8476  
Our sequence TGAGTGCAATGCAGATGGGAAGCGCCATTTCTTCCTGACAACGGACTTTTGG 8476  
Score \*\*\*\*\*

JN127373.1 AGGCCGCTCGCTCGCATGTCGAGCGAGTACAGTGACCCTATGGCCTCGGCCA 8528  
Our sequence AGGCCGCTCGCTCGCATGTCGAGCGAGTACAGTGACCCTATGGCCTCGGCCA 8528  
Score \*\*\*\*\*

JN127373.1 TTGGTTACATCCTCCTTTATCCTTGGCACCCCATCACACGGTGGGTTCATCAT 8580  
Our sequence TTGGTTACATCCTCCTTTATCCTTGGCACCCCATCACACGGTGGGTTCATCAT 8580  
Score \*\*\*\*\*

JN127373.1 CCCGCACGTGCTAACGTGCGCGTTTTGGGGTGGTGGCACACCGTCTGATCCT 8632  
Our sequence CCCGCACGTGCTAACGTGCGCGTTTTGGGGTGGTGGCACACCGTCTGATCCT 8632  
Score \*\*\*\*\*

JN127373.1 GTGTGGTGCCAGGTACATGGTAACACTACTACAAGTTTCCACTGGACAAACTGC 8684  
Our sequence GTGTGGTGCCAGGTACATGGTAACACTACTACAAGTTTCCACTGGACAAACTGC 8684  
Score \*\*\*\*\*

JN127373.1 CAAACATCATCGTGGCCCTCCACGGACCAGCAGCGTTGAGGGTTACCGCAGA 8736  
Our sequence CAAACATCATCGTGGCCCTCCACGGACCAGCAGCGTTGAGGGTTACCGCAGA 8736  
Score \*\*\*\*\*



JN127373.1 CACAACCAAAAACAAAAATGGAGGCCGGCAAGGTGCTGAGCGACCTCAAGCTC 8788  
Our sequence CACAACCAAAAACAAAAATGGAGGCCGGCAAGGTGCTGAGCGACCTCAAGCTC 8788  
Score \*\*\*\*\*

JN127373.1 CCGGGCTTAGCGGTCCACCGTAAGAAGGCTGGAGCATTGCGAACCCGCATGC 8840  
Our sequence CCGGGCTTAGCGGTCCACCGTAAGAAGGCTGGAGCATTGCGAACCCGCATGC 8840  
Score \*\*\*\*\*

JN127373.1 TTCGGTCGCGCGGTTGGGCCGAGTTGGCTCGGGGCCCTGTTGTGGCATCCAGG 8892  
Our sequence TTCGGTCGCGCGGTTGGGCCGAGTTGGCTCGGGGCCCTGTTGTGGCATCCAGG 8892  
Score \*\*\*\*\*

JN127373.1 CCTACGGCTCCCCCCCCCGAGATTGCTGGTATCCC GGGGGGTTTTCCCTG 8944  
Our sequence CCTACGGCTCCCCCCCCCGAGATTGCTGGTATCCC GGGGGGTTTTCCCTG 8944  
Score \*\*\*\*\*

JN127373.1 TCCCCCCCCTACATGGGGGTGGTTCATCAATTGGATTTCCACAAGCCAGAGGA 8996  
Our sequence TCCCCCCCCTACATGGGGGTGGTTCATCAATTGGATTTCCACAAGCCAGAGGA 8996  
Score \*\*\*\*\*

JN127373.1 GTCGCTGGCGGTGGTTGGGGTTCTTAGCCCTGCTCATCGTAGCCCTCTTCGG 9048  
Our sequence GTCGCTGGCGGTGGTTGGGGTTCTTAGCCCTGCTCATCGTAGCCCTCTTCGG 9048  
Score \*\*\*\*\*

JN127373.1 GTGAACTAAATTCATCTGTTGCGGCCAAGGTCTGGTGACTGATCATCACCGGA 9100  
Our sequence GTGAACTAAATTCATCTGTTGCGGCCAAGGTCTGGTGACTGATCATCACCGGA 9100  
Score \*\*\*\*\*

JN127373.1 GGAGGTTCCCGCCCTCCCCGCCCCAGGGGTCTCCCCGCTGGGTAAAAAGGGC 9152  
Our sequence GGAGGTTCCCGCCCTCCCCGCCCCAGGGGTCTCCCCGCTGGGTAAAAAGGGC 9152  
Score \*\*\*\*\*

JN127373.1 CCGGCCTTGGGAGGCATGGTGGTTACTAACCCCTGGCAGGGTCAAAGCCTG 9204  
Our sequence CCGGCCTTGGGAGGCATGGTGGTTACTAACCCCTGGCAGGGTCAAAGCCTG 9204  
Score \*\*\*\*\*

JN127373.1 ATGGTGCTAATGCACTGCCACTTCGGTGGCGGGTCGCTACCTTATAGCGTAA 9256  
Our sequence ATGGTGCTAATGCACTGCCACTTCGGTGGCGGGTCGCTACCTTATAGCGTAA 9256  
Score \*\*\*\*\*

JN127373.1 TCCGTGACTACGGGCTGCTCGCAGAGCCCTCCCCGGATGGGGCACAGTGCAC 9308  
Our sequence TCCGTGACTACGGGCTGCTCGCAGAGCCCTCCCCGGATGGGGCACAGTGCAC 9308  
Score \*\*\*\*\*

JN127373.1 TGTGATCTGAAGGGGTGCACCCCGGTAAGAGCTCAG 9344  
Our sequence TGTGATCTGAAGGGGTGCACCCCGGTAAGAGCTCAG 9344  
Score \*\*\*\*\*
