# Supplementary material for: Whole-genome sequencing of human Pegivirus variant from an Egyptian patient co-infected with hepatitis C virus: a case report
Source: Springer Nature journal article supplement (doi:10.1186/s12985-019-1242-5), 2019-11-11
Supplement: MOESM4 [file 17374630]

HcV-NS5A -----PSQTSPSQVDQRRLLFHPVRHILVTGGLGL 28  
 HGV-NS5A-2 NQKSMRCRSDTSGICGSGSCARCVW\*WPD SGPSAPWCRYRYGTAGRGGLENGCWM 55  
 Score \* . . \*\* \* : . . : : . \* :

HcV-NS5A GLHRTQ\*LQDVAQSKTAASHARHPLPFLPEGI\*GGMARGWCNAHHMLLRG-RNSR 82  
 HGV-NS5A-2 GMLRVAAAFVGASSQATCLMGNSKNQ-FIPQSCADTIGWGPCRSTCWDTGKPRPSW 109  
 Score \*: \* . : . . . . \* . : \* : \* . . . . \* \* :

HcV-NS5A PHQER---LHEDRGAEHLQQHLARYVPHQRLHHRSWRAHPVAELQVCDVAGVC\*G 134  
 HGV-NS5A-2 PLTPRRWYLSGRRAGRRWW\*PPPTW\*SGAPRPTSCCASKFFRPL\*LSPTTSTAFR 164  
 Score \* \* \* \* . . . . : . : . . : : \* . . . . .

HcV-NS5A VRGSA\*GRRLLPLHHWGDAG\*HQVPLPSSCS\*VLRGGRRQAPSVRPPMQALAEGG 189  
 HGV-NS5A-2 SHGTLTR---EHQRWSMAPGKVLPLTGSATPCRTSCGLGMWRPLRFHPRCPLTLG 216  
 Score : \* : : : \* . \* : : \* . . \* . : \* . . . . \*

HcV-NS5A GDIFSGPQHIRGGIPAPMRAGARRKCANIHANRSISYNSRSSRSPVQGQGIT-LP 243  
 HGV-NS5A-2 RRLKTQN\*-LRPTCRRLLPSRLSRMLREFLSLTLMSWRITAVHPLSVVAERCQ 270  
 Score : : : \* : . . : . . . : : . \* : : \* . . : :

HcV-NS5A GQFLREPIVCSIS\*SHMHPS\*FPWR\*---PHRV\*PLMGY\*CYMLLYRG\*V\*GEG 295  
 HGV-NS5A-2 CGAKTSPALHRQHLSRLPRAAQMKRPRRCLPRRRI PRPLTHSKSFQRRRRPEGMT 325  
 Score . \* : \* : : : : \* : \* \* . : \* \*

HcV-NS5A HGARFFRATGG\*D\*\*RGSFHCRR--RNPAAFQEVPSSTNLG\*ARLQSTLD\*EVE 347  
 HGV-NS5A-2 MSSTWLFY\*KP CSHRAMPHAS\*R\*RCRAAWRRASRASFPWG\*PWLTLWACAKWR 380  
 Score . : : . \* . \* . \* \* : : . . : \* \* . \* . :

HcV-NS5A AAEL\*PPGRSRLCFAT\*KADPRPPP\*EEADGRAFRVDG 385  
 HGV-NS5A-2 SRTIQPIVTRCALRLNCR LGAWWAMNLP LNVT SVR--- 415  
 Score : : \* . : . . : : \* :
