# Supplementary material for: Whole-genome sequencing of human Pegivirus variant from an Egyptian patient co-infected with hepatitis C virus: a case report
Source: Springer Nature journal article supplement (doi:10.1186/s12985-019-1242-5), 2019-11-11
Supplement: MOESM5 [file 17374630]

HGV-NS5B --LGRKPWLLSPTSGLACRSRGPLRPSPLW\*GRLARC\*WLTTPRCMSPIQTTWGG  
HcV-NS5b PRLCDRLVVHRKRVGCCVLLNVIFMD--WGAGNTLCG\*GSQAANQPPEQLTAAP  
Score \* . \* : \* . \* . : . \* . : \* : . . \* \* \* .

HGV-NS5B EWTRLPSGVLPGFTTNSLWTLSSARERQLKPA\*AWVTLMRRQ\*GLLGHMLPWAGD  
HcV-NS5b S\*HGVCHDLQVCHHTAEEGHLRPTPGGRQSLL\*CPKGD\*DPSVHREGSLAFCRGS  
Score . : .: . \* . \* .: : . \* . . \* : \*

HGV-NS5B LRCRSRTSPPLRGRWLSMTDFRRYLKGLRSHLP\*L\*KRRCSSKTVRRRRPPASLC  
HcV-NS5b LRPDAPPFC\*IQIWLKGRSESEF\*QGR\*PHQLRVGGLAGGPNHPLNDHHGQK\*  
Score \*\* : . : : . . : : \* . \* : . . : . .

HGV-NS5B SLPWTSG\*-LKS\*SWGTRVEWPRRCWGGLTPSSTPQTSGLRRCSSCGNQKPLAP  
HcV-NS5b GLLREAGEGRPKASASNRI SRPRGPGLREESAL\*RRPTLHGHYGSFLRLPIISS  
Score . \* : \* . \* . \* .: . \* \* . : : : \* : . . : \* : .

HGV-NS5B SAWTRRASTVALLKRTWRWRR-SYMLWLQTTQSGCEPWGNTMLQAPWLPKGFPS  
HcV-NS5b AAGRIPFVVRVGFQEGSHGVLI\*HPLL\*LHCD\*ERHQGRGGSLSVL\*SGA\*GSQGH  
Score : \* \* : : : : \* \* : . : \* : : . .

HGV-NS5B VRGTVDPQGF\*PPARATA\*PATLRCQPPAREWD\*KMSRFSSRAMTV\*SYANG---  
HcV-NS5b NRPHRETLRGRPHV\*QQGRPMRQPQVPRERGFYHQLRKHTDVL\*GHSRHQGGRP  
Score \* : . \* . . \* \* \* : : : : . \* : \*

HGV-NS5B QCATRAKLWAE\*RAMGTRANLRIMHHWTRPPSAPLGLLSAMQMGSAISS\*QRTF  
HcV-NS5b EGLHHAGLR\*\*PGRHR\*ERRC\*GGQPSTSSFHGSYDKILGTPRRRPATSV\*LGTD  
Score : \* \* \* \* \* : . : \* : : . \* \* \* \*

HGV-NS5B GGRSLACRASTVTLWPRPLVTSSFILGTPSHGGSSSRTC\*RARFGVVAHRLILCG  
HcV-NS5b NILLQCLSRTRCDRQKGLLPDRP\*NPPGSSSLGNSPTHSSQFLVG\*HYTLRA-  
Score . \* \* : \* : \* : . . . . . : \* \* \* : .
